# Supplementary material for: The altered serum lipidome and its diagnostic potential for Non-Alcoholic Fatty Liver (NAFL)-associated hepatocellular carcinoma
Source: PubMed Central journal article supplement — eBioMedicine. 2021 Oct 29;73:103661. doi: 10.1016/j.ebiom.2021.103661 (PMC8577325; doi:10.1016/j.ebiom.2021.103661), 2021-10-29
Supplement: mmc8.pdf [file mmc8.pdf]

A

The most active and suppressed reactions among lipid classes between NAFLD-HCC and CTRL

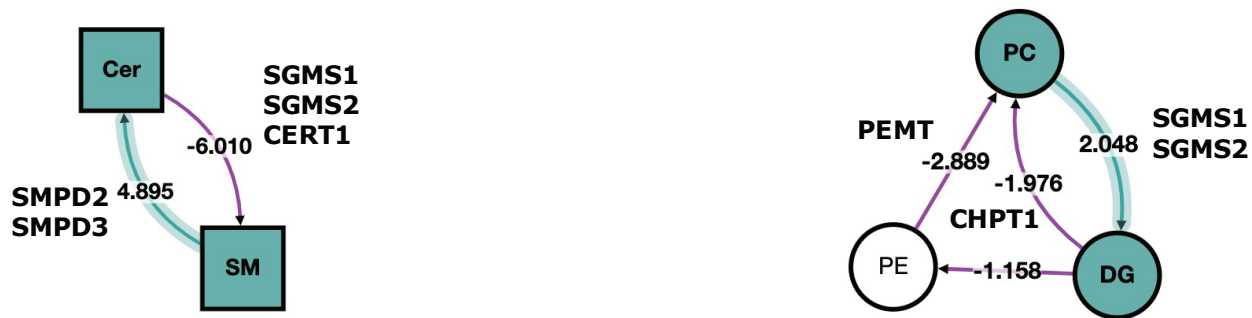

B

The most active and suppressed reactions among lipid classes between NAFLD-HCC and OB-NAFLD

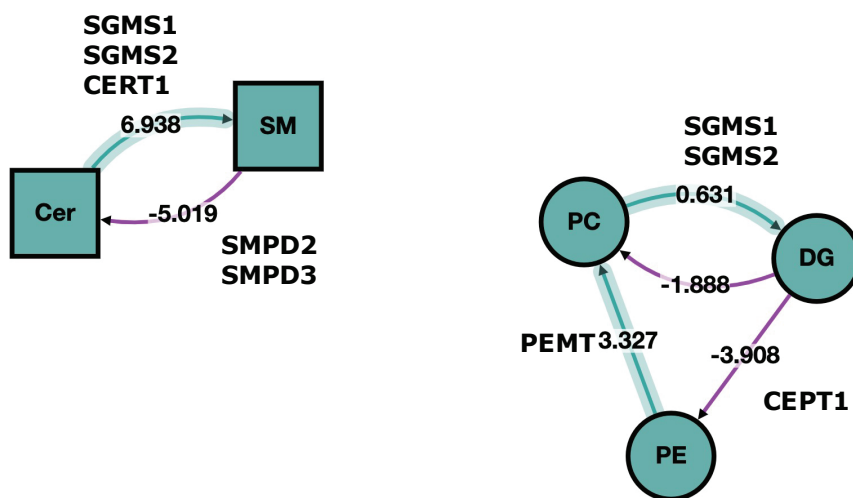

C

The most active and suppressed reactions among lipid classes between NAFLD-HCC and AV-HCC

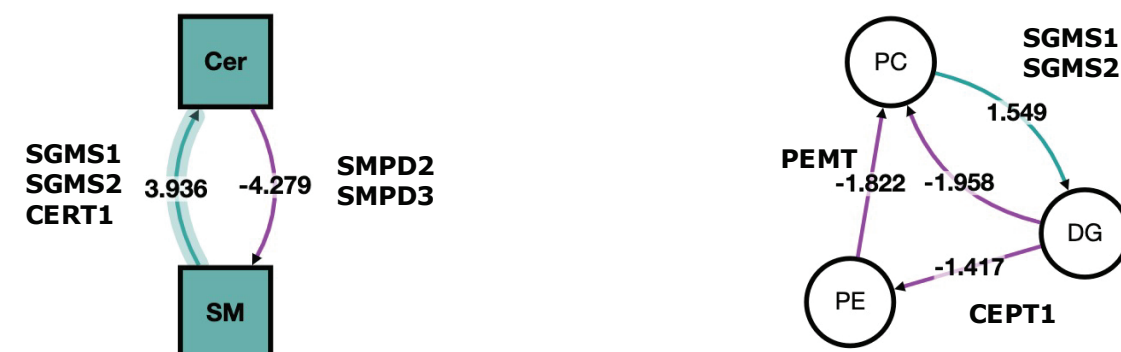

Nodes shape

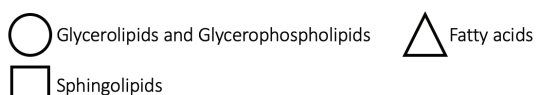

Nodes color

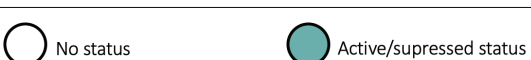

Edges color

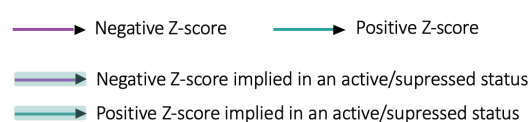

Figure S5
