# Supplementary material for: The altered serum lipidome and its diagnostic potential for Non-Alcoholic Fatty Liver (NAFL)-associated hepatocellular carcinoma
Source: PubMed Central journal article supplement — eBioMedicine. 2021 Oct 29;73:103661. doi: 10.1016/j.ebiom.2021.103661 (PMC8577325; doi:10.1016/j.ebiom.2021.103661), 2021-10-29
Supplement: mmc9.pdf [file mmc9.pdf]

### A The most active and suppressed reactions among FA between NAFLD-HCC and CTRL

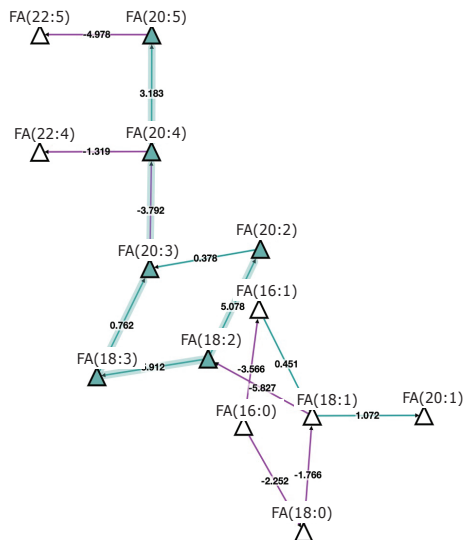

| FFA most active reaction (NAFLD-HCC vs CTRL)     |         |                                     |
|--------------------------------------------------|---------|-------------------------------------|
| Reactions chains                                 | Z-score | Predicted genes                     |
| FA(20:4)->FA(20:5)                               | 3.183   | FADS1                               |
| FA(18:2)->FA(18:3)->FA(20:3)->FA(20:4)->FA(20:5) | 3.032   | FADS2, ELOVL5, ELOVL7, FADS1, FADS1 |
| FFA most suppressed reaction (NAFLD-HCC vs CTRL) |         |                                     |
| Reactions chains                                 | Z-score | Predicted genes                     |
| FA(18:1)->FA(18:2)                               | 5.827   | FADS2                               |
| FA(18:0)->FA(18:1)->FA(18:2)                     | 5.369   | SCD1, FADS2                         |
| FA(20:5)->FA(22:5)                               | 4.978   | ELOVL5, ELOVL2                      |
| FA(20:3)->FA(20:4)->FA(22:4)                     | 3.614   | FADS1, ELOVL5, ELOVL2               |
| FA(16:0)->FA(16:1)->FA(18:1)->FA(18:2)->FA(20:2) | 1.932   | SCD3, ELOVL5, ELOVL6, FADS2, ELOVL5 |

### B The most active and suppressed reactions among FA between NAFLD-HCC and OB-NAFLD

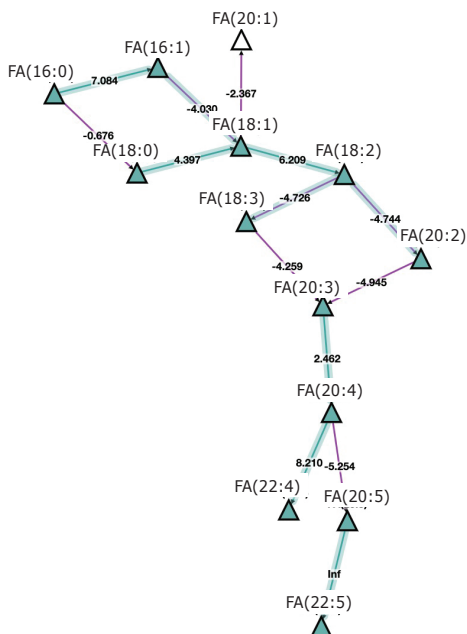

| FFA most active reaction (NAFLD-HCC vs OB-NAFLD)     |         |                                     |
|------------------------------------------------------|---------|-------------------------------------|
| Reactions chains                                     | Z-score | Predicted genes                     |
| FA(20:4)->FA(20:5)                                   | 5.254   | FADS1                               |
| FA(18:2)->FA(18:3)                                   | 4.726   | FADS2                               |
| FA(16:1)->FA(18:1)->FA(20:1)                         | 4.523   | ELOVL5, ELOVL6, ELOVL3              |
| FA(20:2)->FA(20:3)->FA(20:4)->FA(20:5)               | 4.467   | FADS1, FADS1, FADS1                 |
| FA(18:3)->FA(20:3)                                   | 4.259   | ELOVL5, ELOVL7                      |
| FA(18:1)->FA(20:1)                                   | 2.367   | ELOVL3                              |
| FFA most suppressed reaction (NAFLD-HCC vs OB-NAFLD) |         |                                     |
| Reactions chains                                     | Z-score | Predicted genes                     |
| FA(20:5)->FA(22:5)                                   | Inf     | ELOVL5, ELOVL2                      |
| FA(20:4)->FA(22:4)                                   | 8.21    | ELOVL5, ELOVL2                      |
| FA(20:3)->FA(20:4)->FA(22:4)                         | 7.546   | FADS1, ELOVL5, ELOVL2               |
| FA(18:1)->FA(18:2)                                   | 6.209   | FADS2                               |
| FA(18:0)->FA(18:1)->FA(18:2)->FA(20:2)               | 3.384   | SCD1, FADS2, ELOVL5                 |
| FA(16:0)->FA(16:1)->FA(18:1)->FA(18:2)->FA(20:2)     | 2.259   | SCD3, ELOVL5, ELOVL6, FADS2, ELOVL5 |

### C The most active and suppressed reactions among FA between NAFLD-HCC and AV-HCC

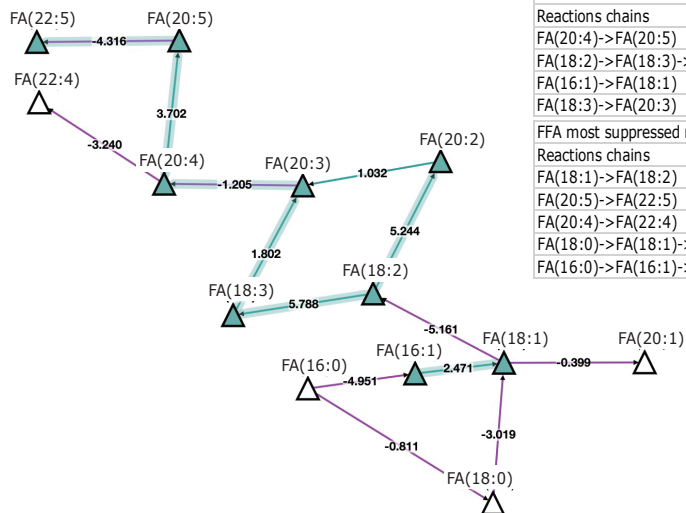

| FFA most active reaction (NAFLD-HCC vs AV-HCC)             |         |                                                     |
|------------------------------------------------------------|---------|-----------------------------------------------------|
| Reactions chains                                           | Z-score | Predicted genes                                     |
| FA(20:4)->FA(20:5)                                         | 3.702   | FADS1                                               |
| FA(18:2)->FA(18:3)->FA(20:3)->FA(20:4)->FA(20:5)->FA(22:5) | 2.581   | FADS2, ELOVL5, ELOVL7, FADS1, FADS1, ELOVL5, ELOVL2 |
| FA(16:1)->FA(18:1)                                         | 2.471   | ELOVL5, ELOVL6                                      |
| FA(18:3)->FA(20:3)                                         | 1.802   | ELOVL5, ELOVL7                                      |
| FFA most suppressed reaction (NAFLD-HCC vs AV-HCC)         |         |                                                     |
| Reactions chains                                           | Z-score | Predicted genes                                     |
| FA(18:1)->FA(18:2)                                         | 5.161   | FADS2                                               |
| FA(20:5)->FA(22:5)                                         | 4.316   | ELOVL5, ELOVL2                                      |
| FA(20:4)->FA(22:4)                                         | 3.24    | ELOVL5, ELOVL2                                      |
| FA(18:0)->FA(18:1)->FA(18:2)->FA(20:2)                     | 1.695   | SCD1, FADS2, ELOVL5                                 |
| FA(16:0)->FA(16:1)->FA(18:1)->FA(20:1)                     | 1.662   | SCD3, ELOVL5, ELOVL6, ELOVL3                        |

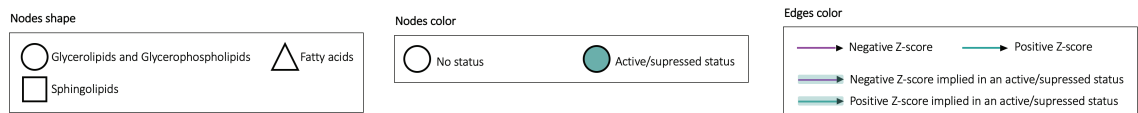

Figure S6
