# Supplementary figures and images for: The altered serum lipidome and its diagnostic potential for Non-Alcoholic Fatty Liver (NAFL)-associated hepatocellular carcinoma
Source: PubMed Central journal article supplement — eBioMedicine. 2021 Oct 29;73:103661. doi: 10.1016/j.ebiom.2021.103661 (PMC8577325; doi:10.1016/j.ebiom.2021.103661), 2021-10-29

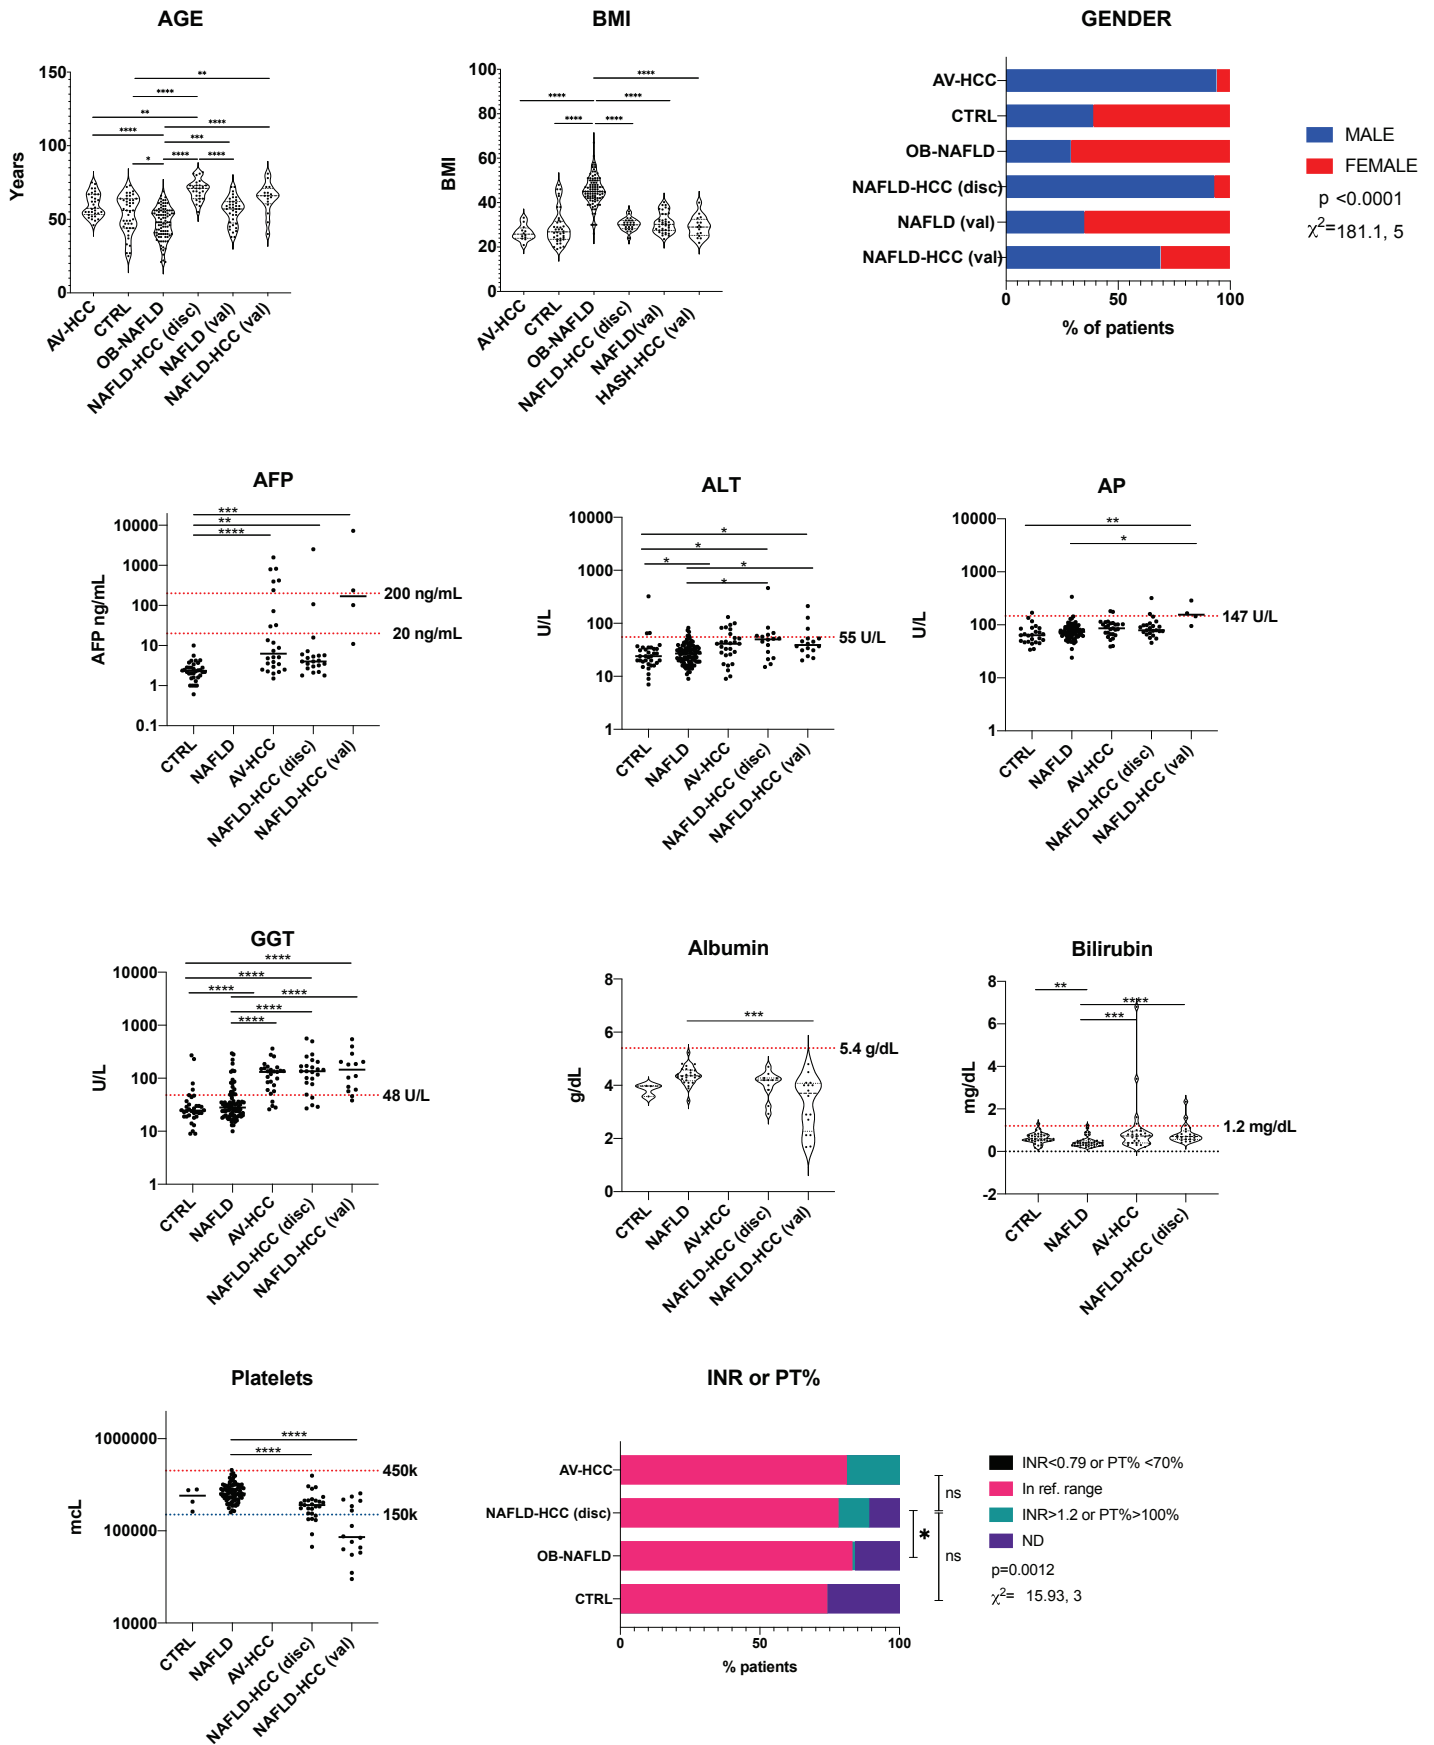

Figure S1

Supplement: mmc4.pdf [file mmc4.pdf]

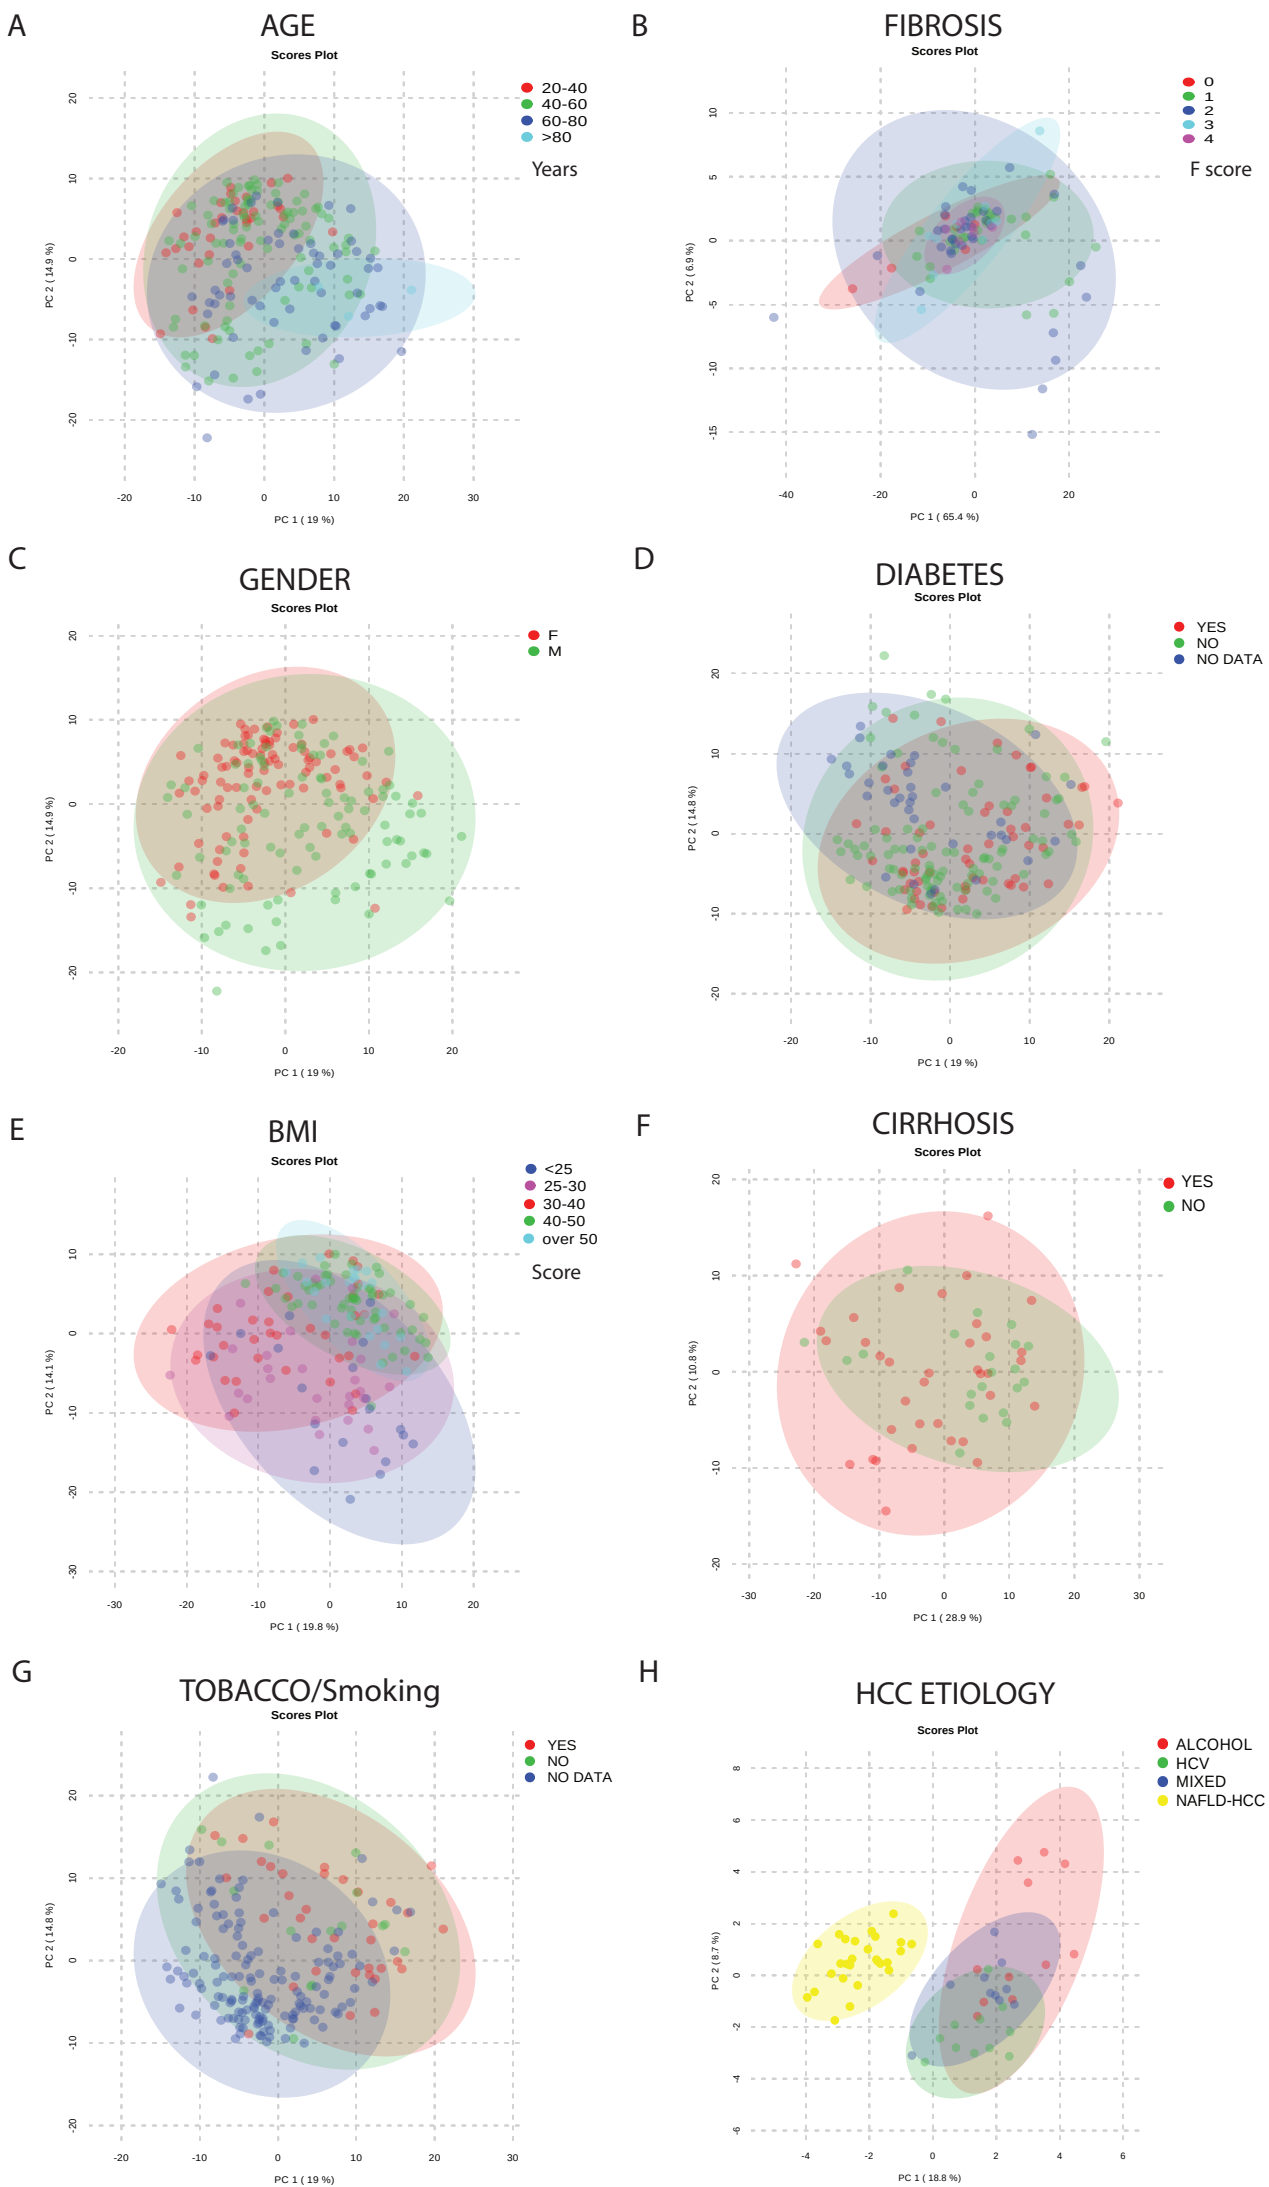

Figure S2

Supplement: mmc5.pdf [file mmc5.pdf]

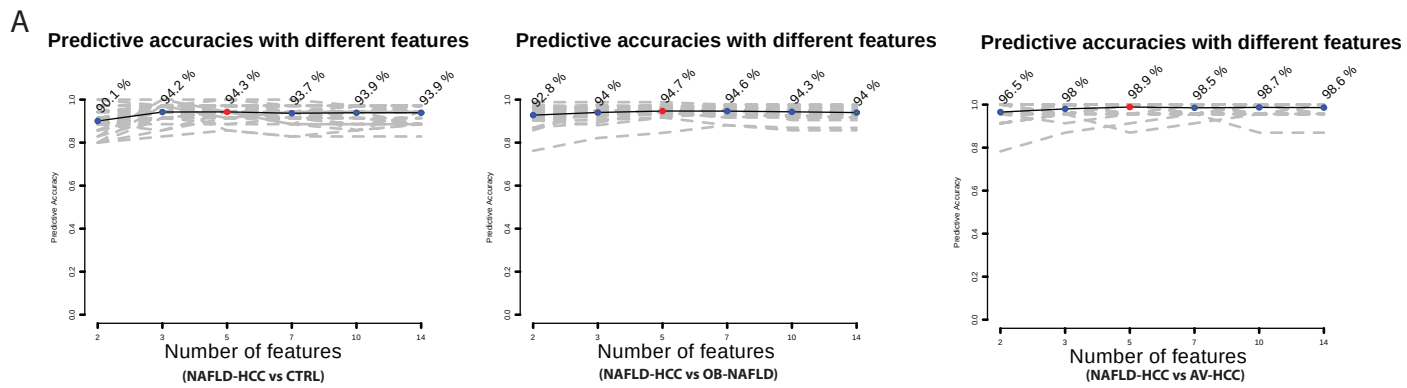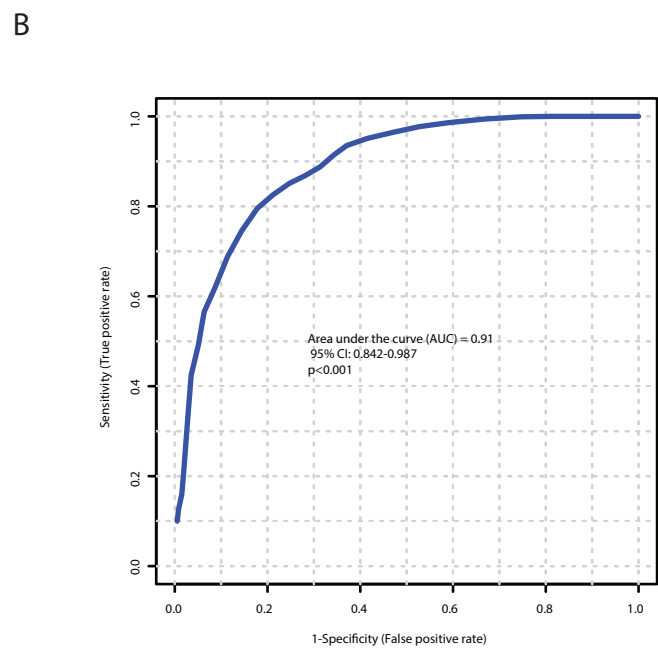

Figure S3

Supplement: mmc6.pdf [file mmc6.pdf]

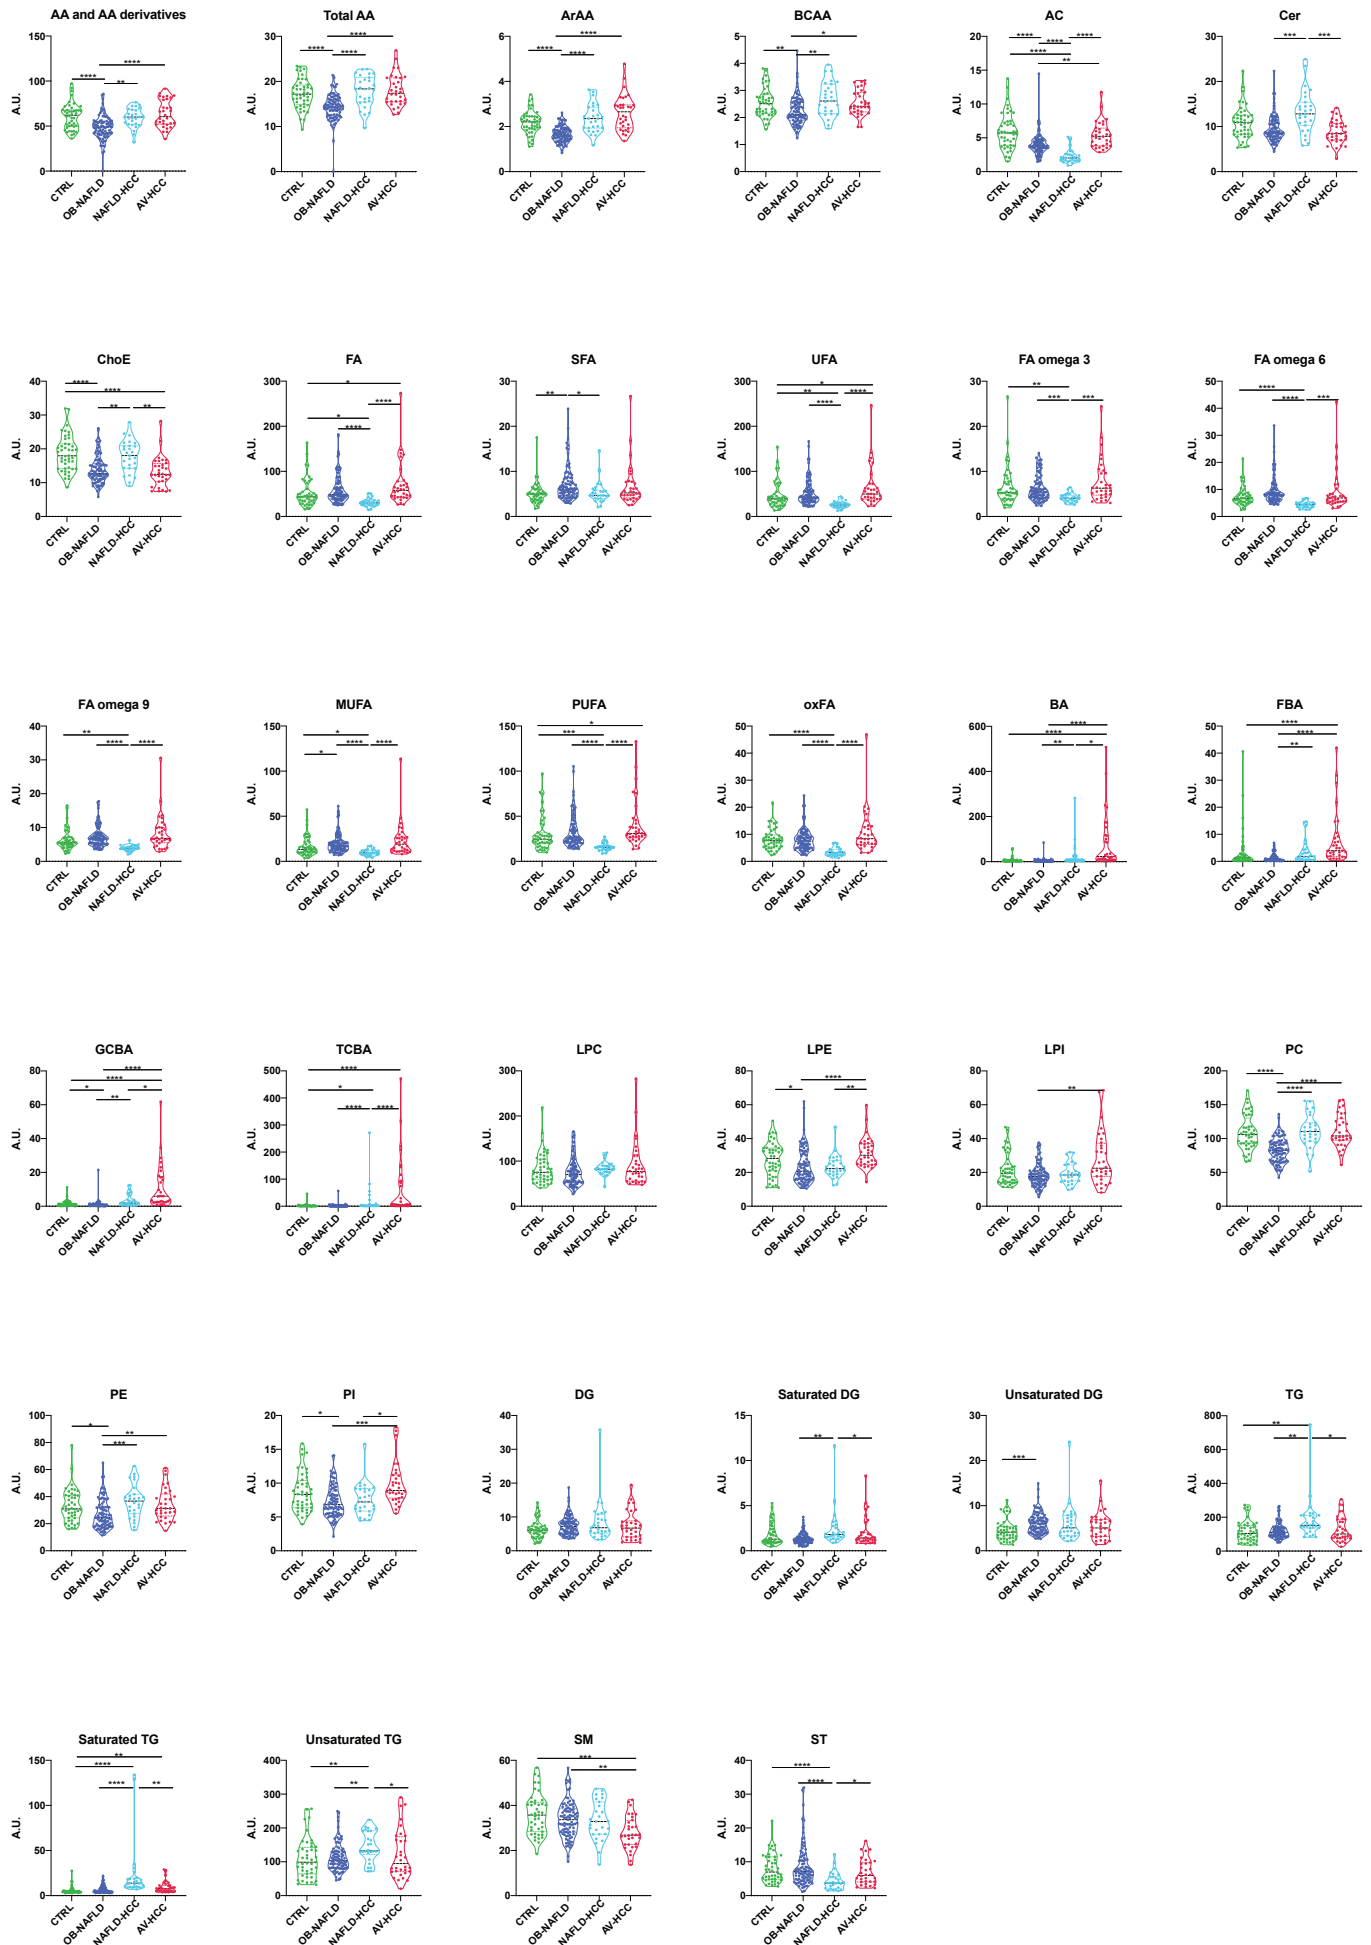

Figure S4

Supplement: mmc7.pdf [file mmc7.pdf]
